# Supplementary material for: Consequences of SPAK inactivation on Hyperkalemic Hypertension caused by WNK1 mutations: evidence for differential roles of WNK1 and WNK4
Source: PubMed Central journal article supplement (PMC5818654; doi:10.1038/s41598-018-21405-x), 2018-02-19
Supplement: 41598_2018_21405_MOESM1_ESM.pdf [file 41598_2018_21405_MOESM1_ESM.pdf]

## **SUPPLEMENTARY FIGURES ONLINE**

**Consequences of SPAK inactivation on Hyperkalemic Hypertension caused by *WNK1* mutations: evidence for differential roles of WNK1 and WNK4.**

Chloé Rafael, Christelle Soukaseum, Véronique Baudrie, Perrine Frère  
and Juliette Hadchouel

# Supplementary Figure S1

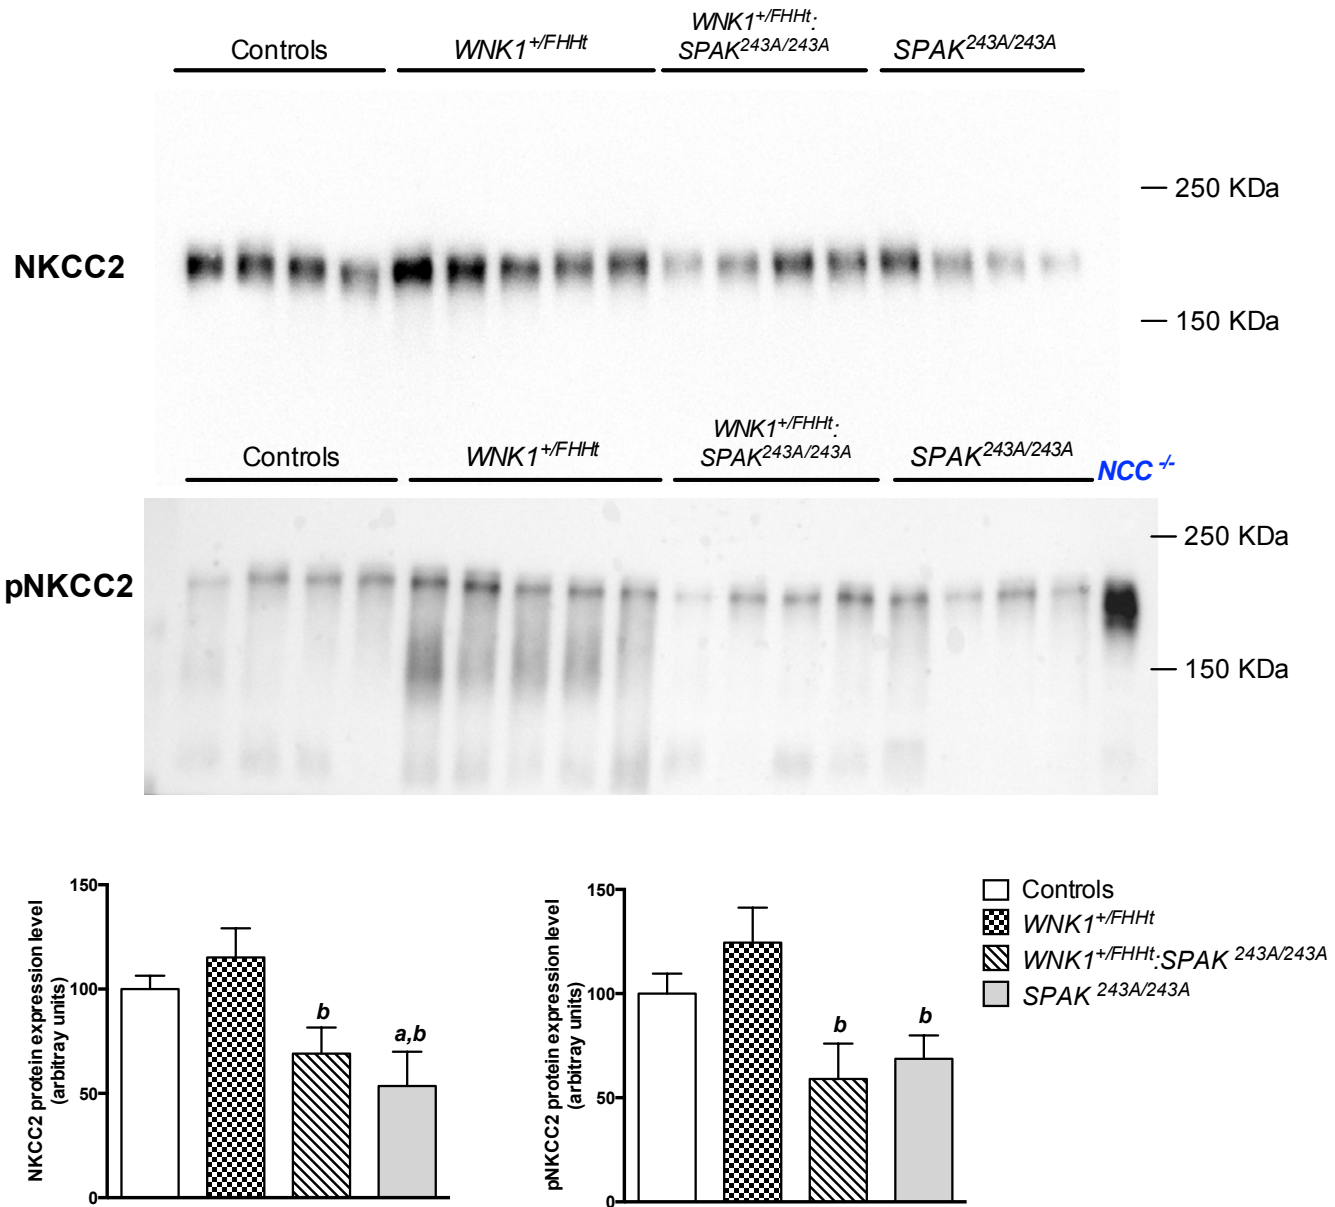

**Supplementary Figure S1. The expression and phosphorylation of NKCC2 are decreased in  $WNK1^{+/FHHt}; SPAK^{243A/243A}$  mice.**

**Upper panel:** Representative immunoblots of NKCC2 and phosphorylated NKCC2 performed on the membrane-enriched fractions of the renal cortex of mice of each genotype. As pNKCC2 antibody is also able to recognize pNCC, we loaded a protein sample extracted from a  $NCC^{-/-}$  mouse kidney (in blue, last lane of the pNKCC2 blot) to identify the band corresponding specifically to pNKCC2.

**Lower panel:** Densitometric analysis. NKCC2 abundance and phosphorylation are decreased in  $WNK1^{+/FHHt}; SPAK^{243A/243A}$  and  $SPAK^{243A/243A}$  mice. In contrast to NCC, there is no difference between these two groups. Number of animals: 4 control, 5  $WNK1^{+/FHHt}$ , 4  $WNK1^{+/FHHt}; SPAK^{243A/243A}$  and 4  $SPAK^{243A/243A}$  male mice. Values are means  $\pm$  s.e.m. <sup>a</sup>  $p < 0.05$  vs. controls. <sup>b</sup>  $p < 0.05$  vs.  $WNK1^{+/FHHt}$  mice (Kruskal-Wallis one-way analysis of variance, followed by Mann-Whitney test). Immunoblot images are full-length images.

# Supplementary Figure S2

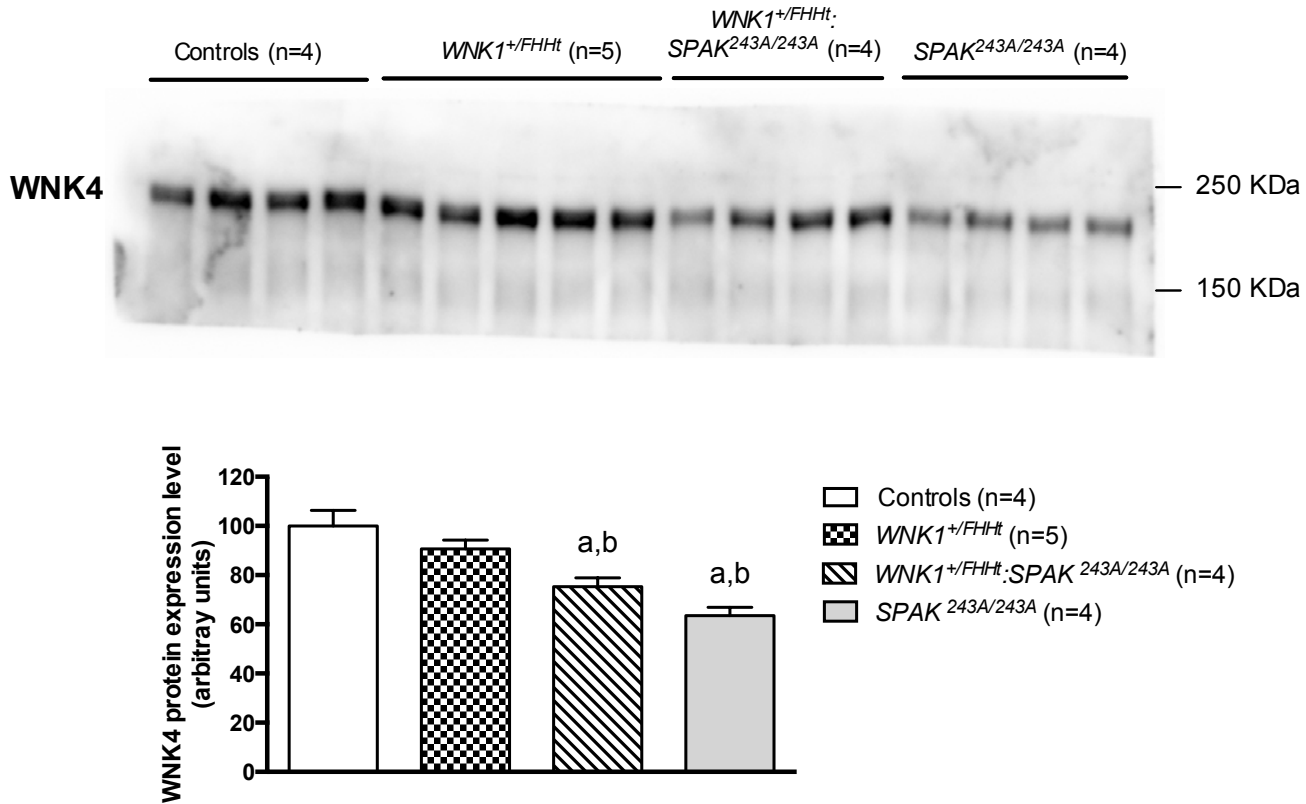

## Supplementary Figure S2. WNK4 expression is decreased in $WNK1^{+/FHHt}; SPAK^{243A/243A}$ mice.

**Upper panel:** Representative immunoblot of WNK4 performed on protein extracted from the renal cortex of mice of each genotype. **Lower panel:** Densitometric analysis. WNK4 abundance is decreased in  $WNK1^{+/FHHt}; SPAK^{243A/243A}$  and  $SPAK^{243A/243A}$  mice compared to control mice. Number of animals: 4 control, 5  $WNK1^{+/FHHt}$ , 4  $WNK1^{+/FHHt}; SPAK^{243A/243A}$  and 4  $SPAK^{243A/243A}$  male mice. Values are means  $\pm$  s.e.m. <sup>a</sup>  $p < 0.05$  vs. controls. <sup>b</sup>  $p < 0.05$  vs.  $WNK1^{+/FHHt}$  mice. The immunoblot image is a full-length image.

# Supplementary Figure S3

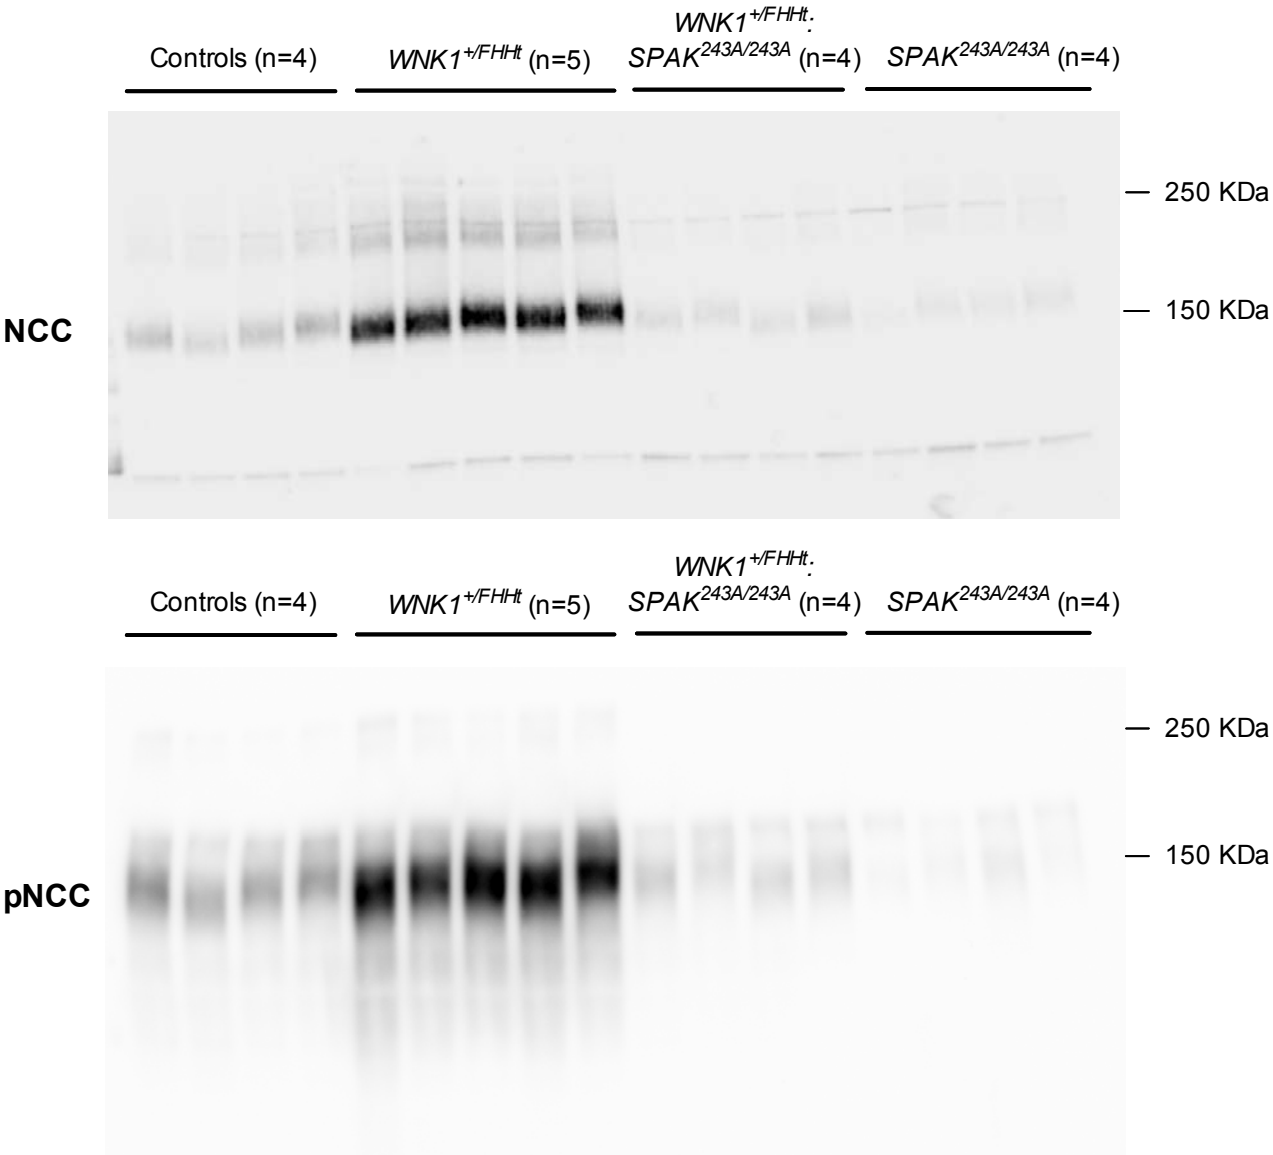

**Supplementary Figure S3. Full-length images of the NCC and pNCC immunoblots, corresponding to Figure 2.**

# Supplementary Figure S4

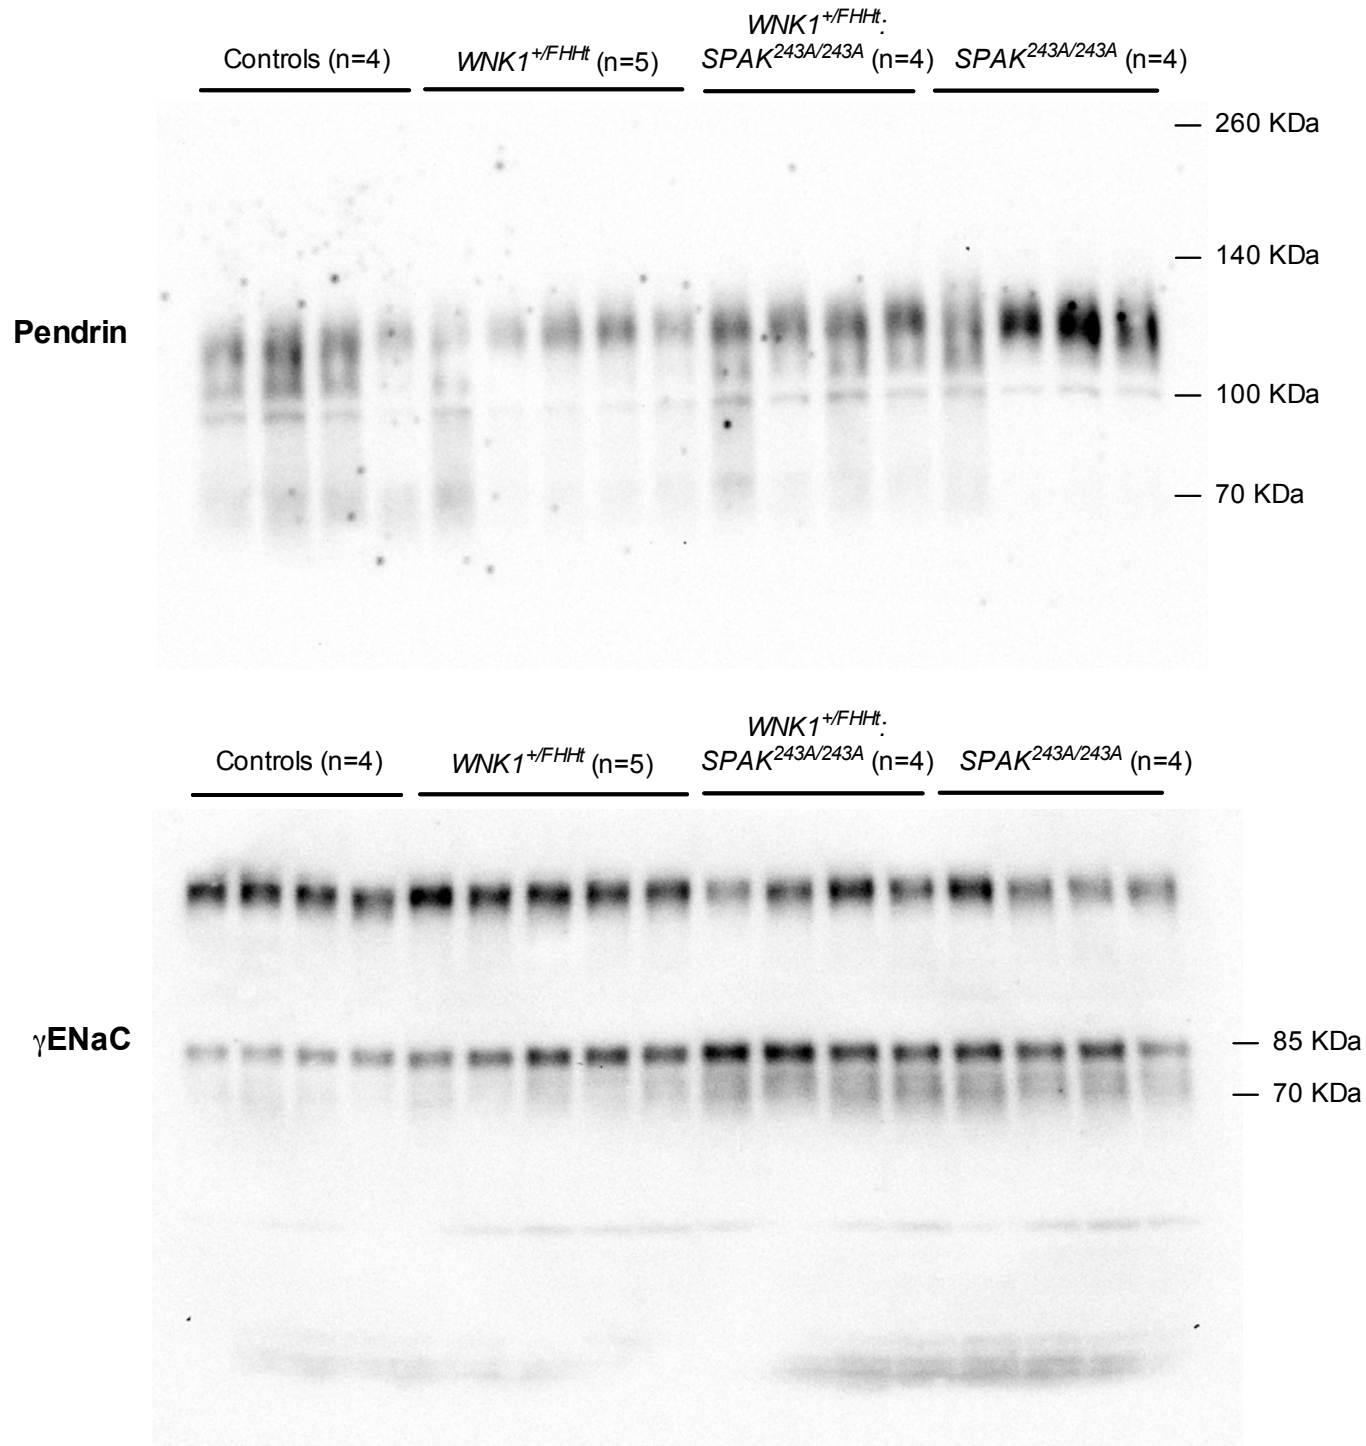

**Supplementary Figure S4. Full-length images of the pendrin and  $\gamma$ ENAC immunoblot, corresponding to Figure 3.**

# Supplementary Figure S5

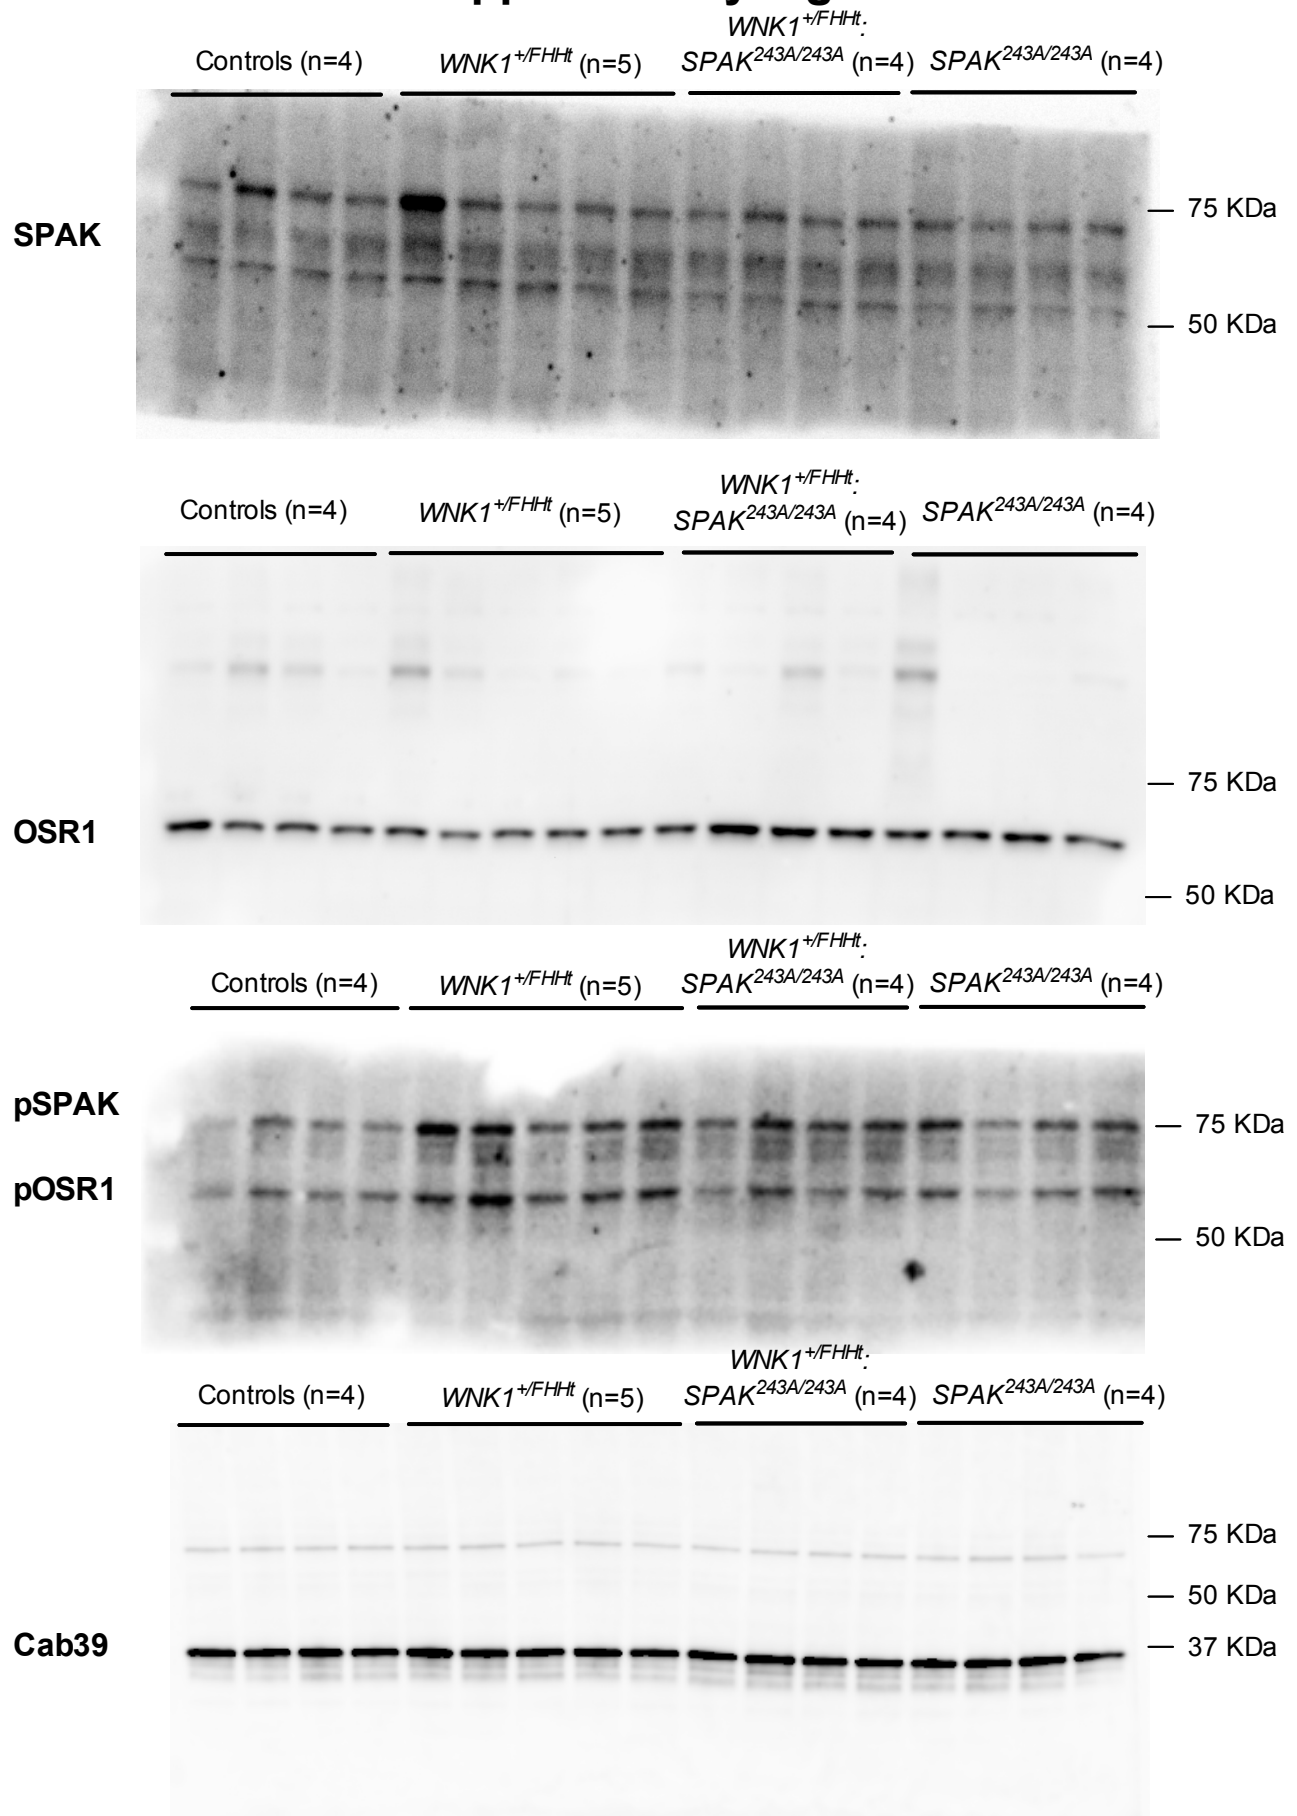

Supplementary Figure S5. Total SPAK, total OSR1, pSPAK/pOSR1 (S-motif) and Cab39 full-length immunoblot images.

# Supplementary Figure S6

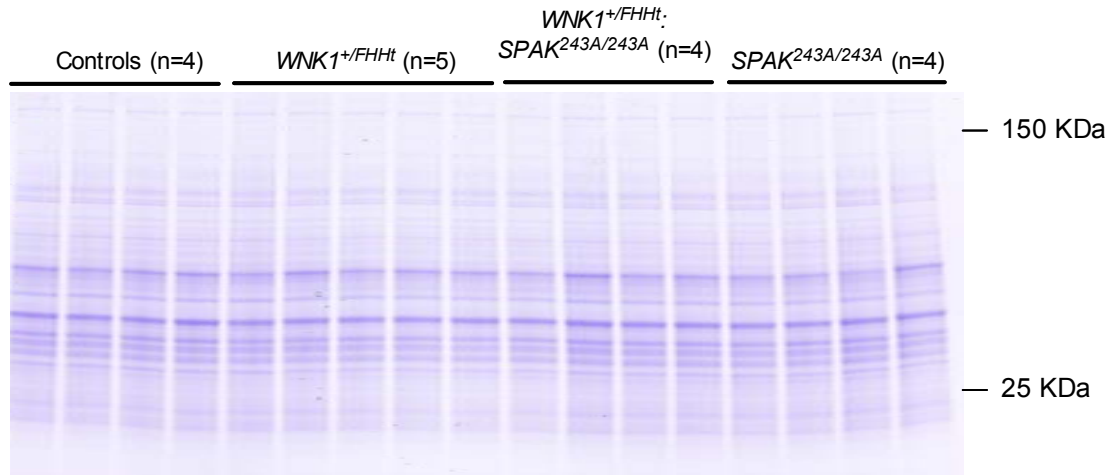

**Supplementary Figure S6. Representative Coomassie gel staining.** Preliminary 10% SDS-PAGE gels were run and stained with Coomassie blue to confirm equality of loading in each lane.

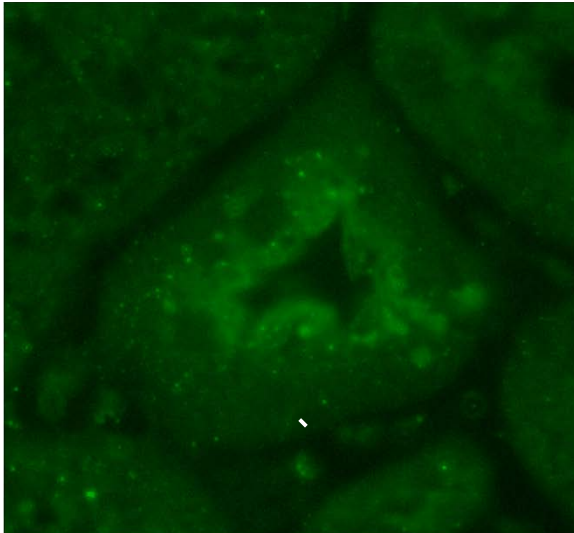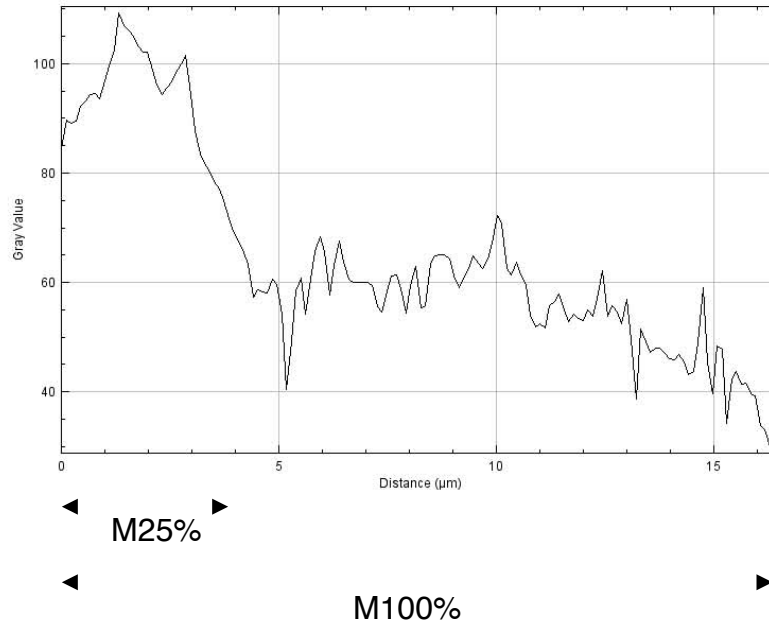

**L** = length of the ROI

**M25%** = Mean intensity of pixels from 0 (apical membrane) to  $L/4$

**M100%** = Mean intensity of all pixels

**Apical OSR1** =  $M25\% / M100\%$

**Supplementary Figure S7. Schematic description of the method used to quantify OSR1 apical staining.** A detailed description is provided in the Material and Methods section.
